# Supplementary material
Source: PubMed Central journal article supplement (PMC2039870)
Supplement: 894_2007_239_MOESM1_ESM.pdf [file 894_2007_239_MOESM1_ESM.pdf]

# Supporting information for:

## $\pi$ - $\pi$ Stacking Tackled with Density Functional Theory

Marcel Swart,<sup>a,b,c</sup> Tushar van der Wijst,<sup>a,d</sup> Célia Fonseca Guerra,<sup>a</sup> and F. Matthias Bickelhaupt<sup>a,\*</sup>

<sup>a</sup> Theoretische Chemie, Vrije Universiteit Amsterdam, De Boelelaan 1083, NL-1081 HV Amsterdam, The Netherlands

<sup>b</sup> Institució Catalana de Recerca i Estudis Avançats (ICREA), E-08010 Barcelona, Spain

<sup>c</sup> Institut de Química Computacional, Universitat de Girona, Campus Montilivi, E-17071 Girona, Spain

<sup>d</sup> Present address: Fachbereich Chemie, Universität Dortmund, Otto-Hahn-Straße 6, D-44227 Dortmund, Germany  
E-mail: FM.Bickelhaupt@few.vu.nl

### Contents

- Figure S1.** Energy as a function of the twist angle for all stacks of DNA bases, computed with standard density functionals and with MP2. p. S2
- Figure S2.** Energy as a function of the twist angle for all stacks of DNA bases, computed with the more satisfactorily performing density functionals and with MP2. p. S3
- Figure S3.** Energy as a function of the twist angle for all stacks of Watson-Crick base pairs, computed with standard density functionals. p. S4
- Figure S4.** Energy as a function of the vertical separation for all stacks of base pairs, computed with various density functionals. p. S5
- Figure S5.** Energy as a function of the twist angle for all stacks of Watson-Crick base pairs, computed with the more satisfactorily performing density functionals. p. S6

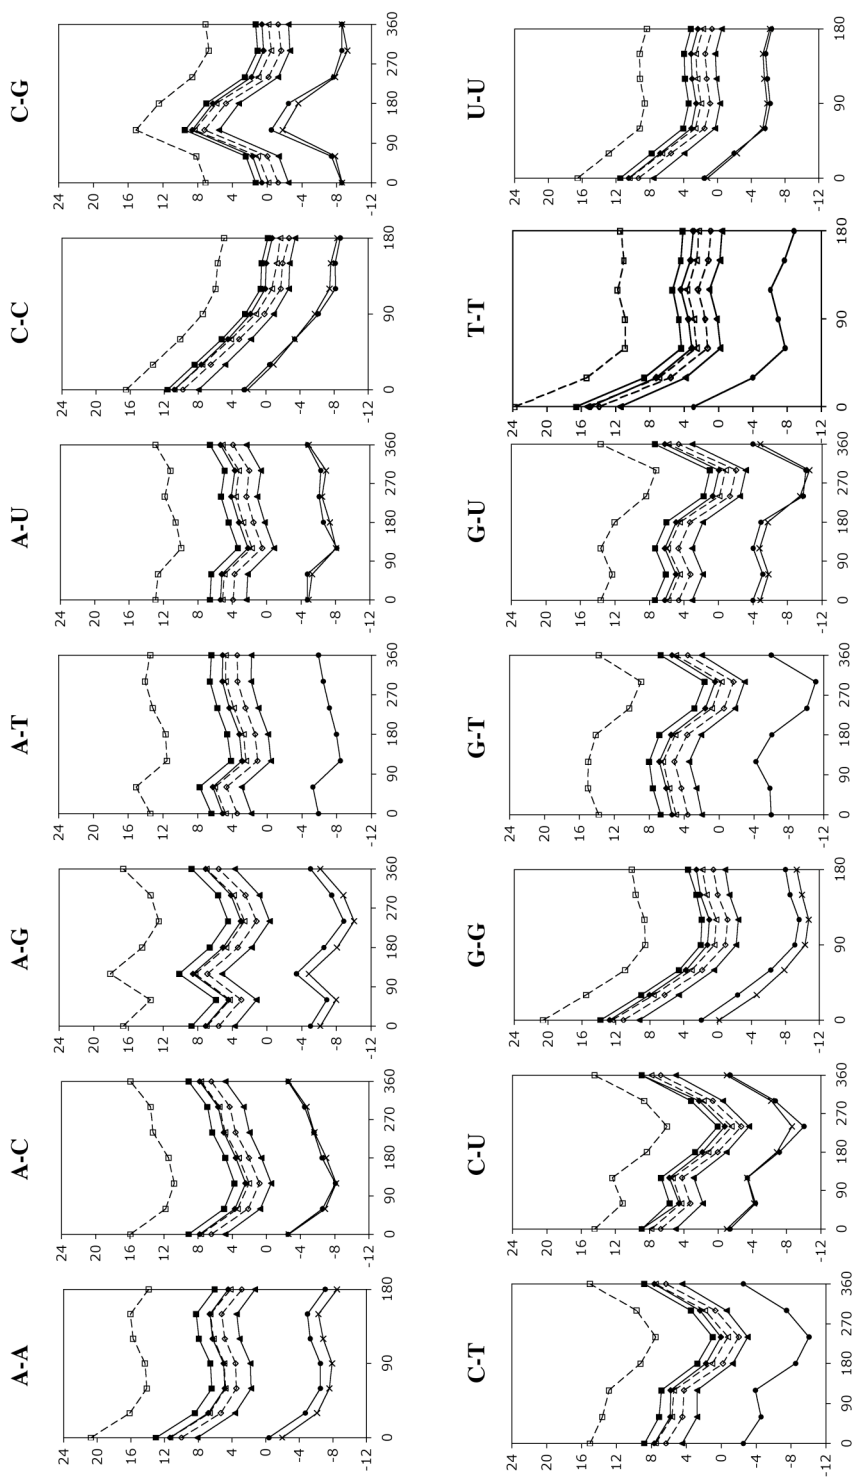

**Figure S1.** Energy (in kcal/mol) as a function of the twist angle (see Figure 1) for all stacks of DNA bases, computed with standard density functionals. The bold lines with filled circles, triangles, squares and diamonds show the results using LDA, PW91, BLYP and BP86, respectively. The dashed lines with open squares, triangles and diamonds show the results obtained with OLYP, B3LYP and X3LYP, respectively. The bold line with crosses represents results obtained using MP2/6-31G\*(0.25).

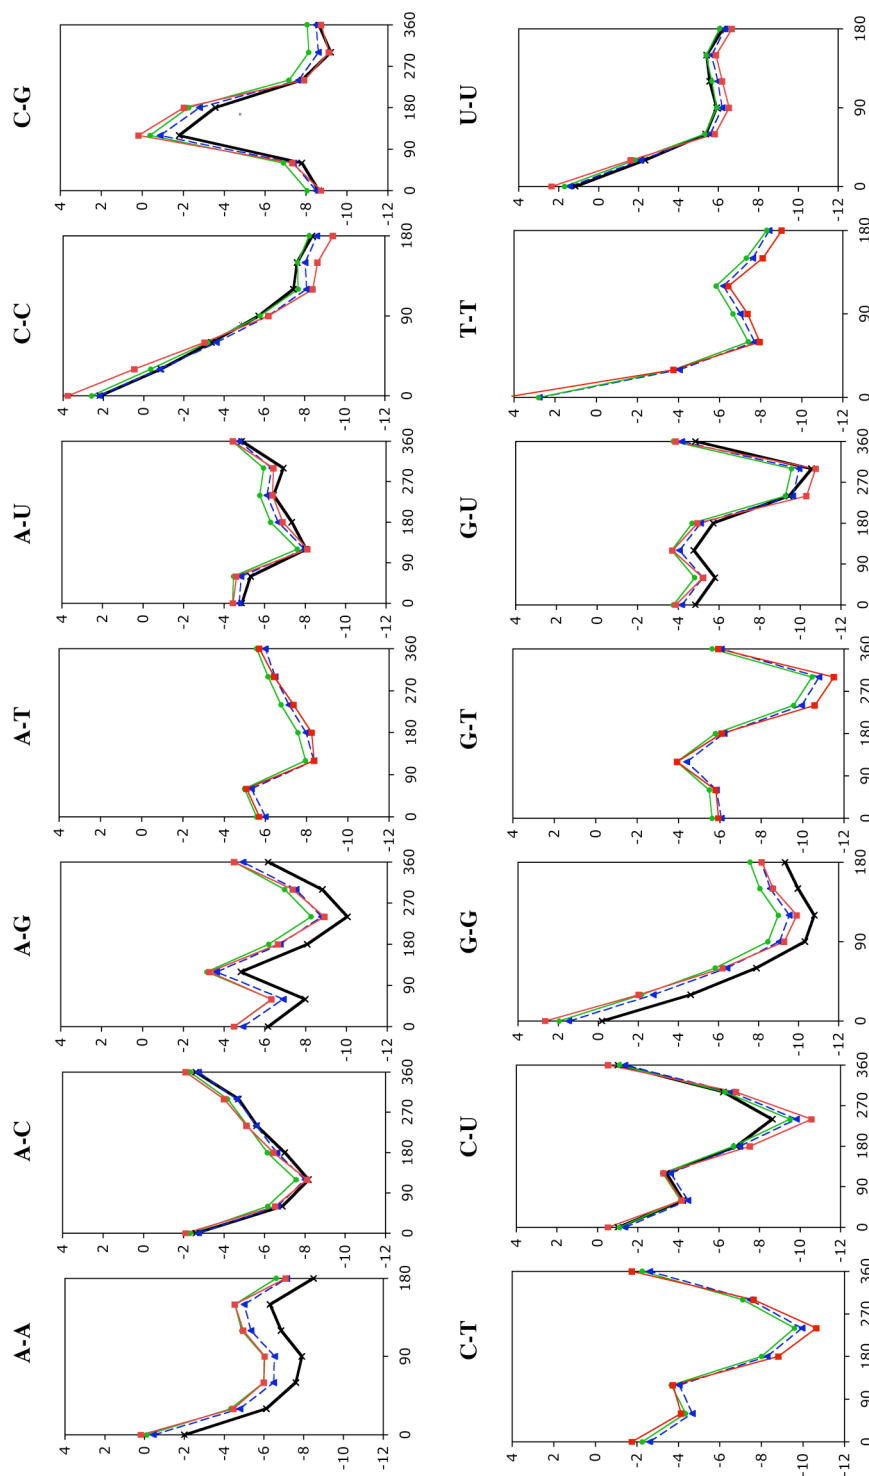

**Figure S2.** Energy (in kcal/mol) as a function of the twist angle (see Figure 1) for all stacks of DNA bases, computed with the more satisfactorily performing density functionals. The red, blue and green lines show the results obtained with BHandH, KT1 and KT2, respectively. The bold black line with crosses represents results obtained using MP2/6-31G\*(0.25).

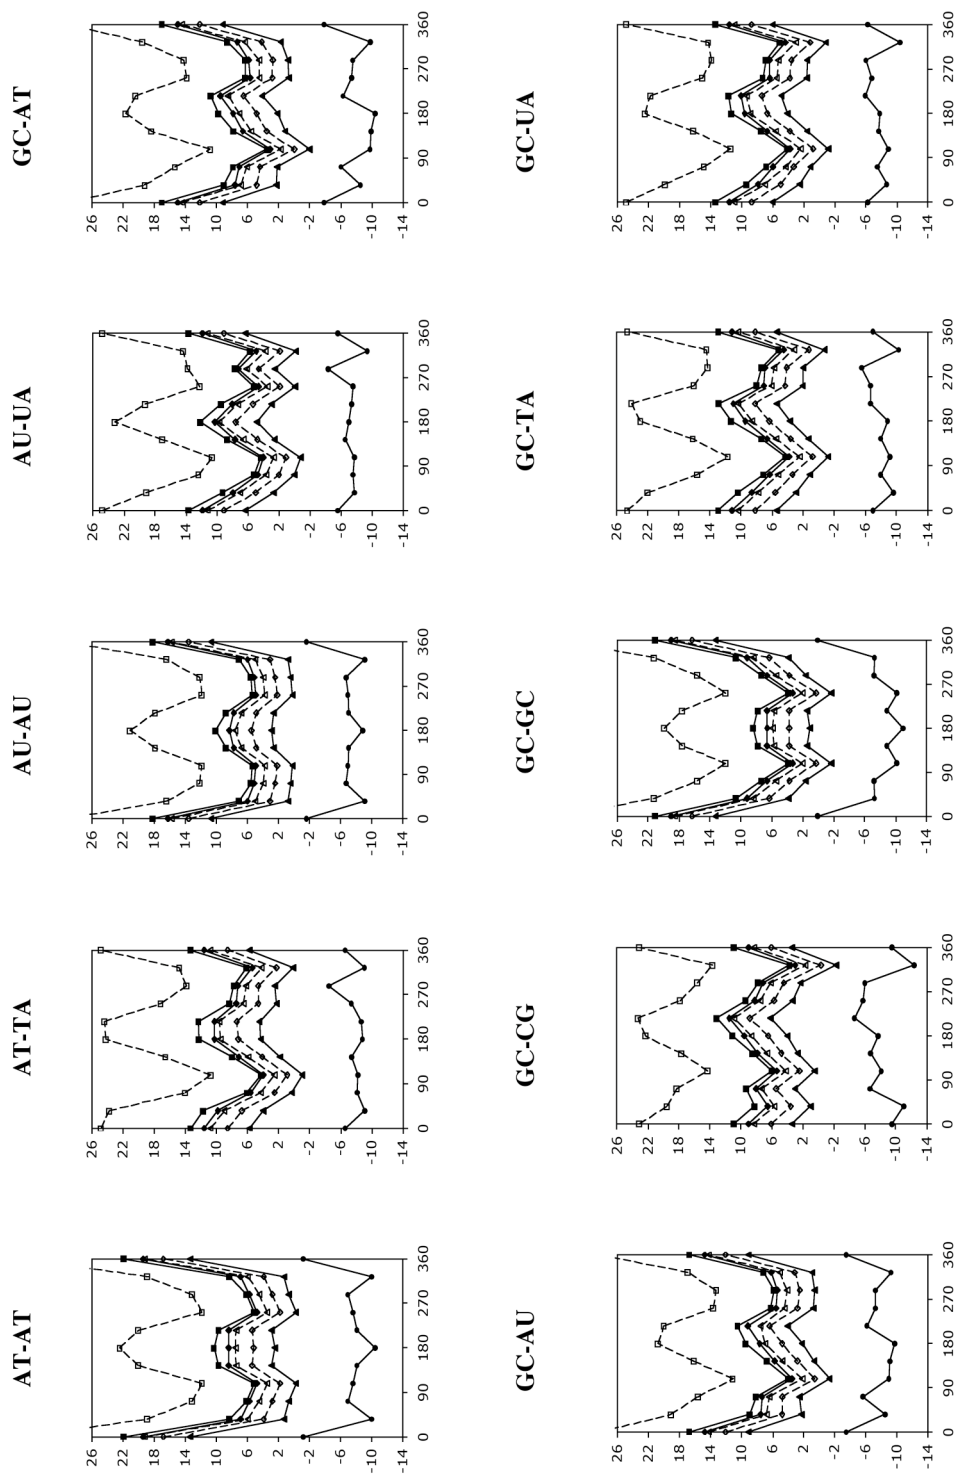

**Figure S3.** Energy (in kcal/mol) as a function of the twist angle (see Scheme 4) for all stacks of Watson-Crick base pairs, computed with standard density functionals. The bold lines with filled circles, triangles, squares and diamonds show the results obtained using LDA, PW91, BLYP and BP86, respectively. The dashed lines with open squares, triangles and diamonds show the results obtained with OLYP, B3LYP and X3LYP, respectively.

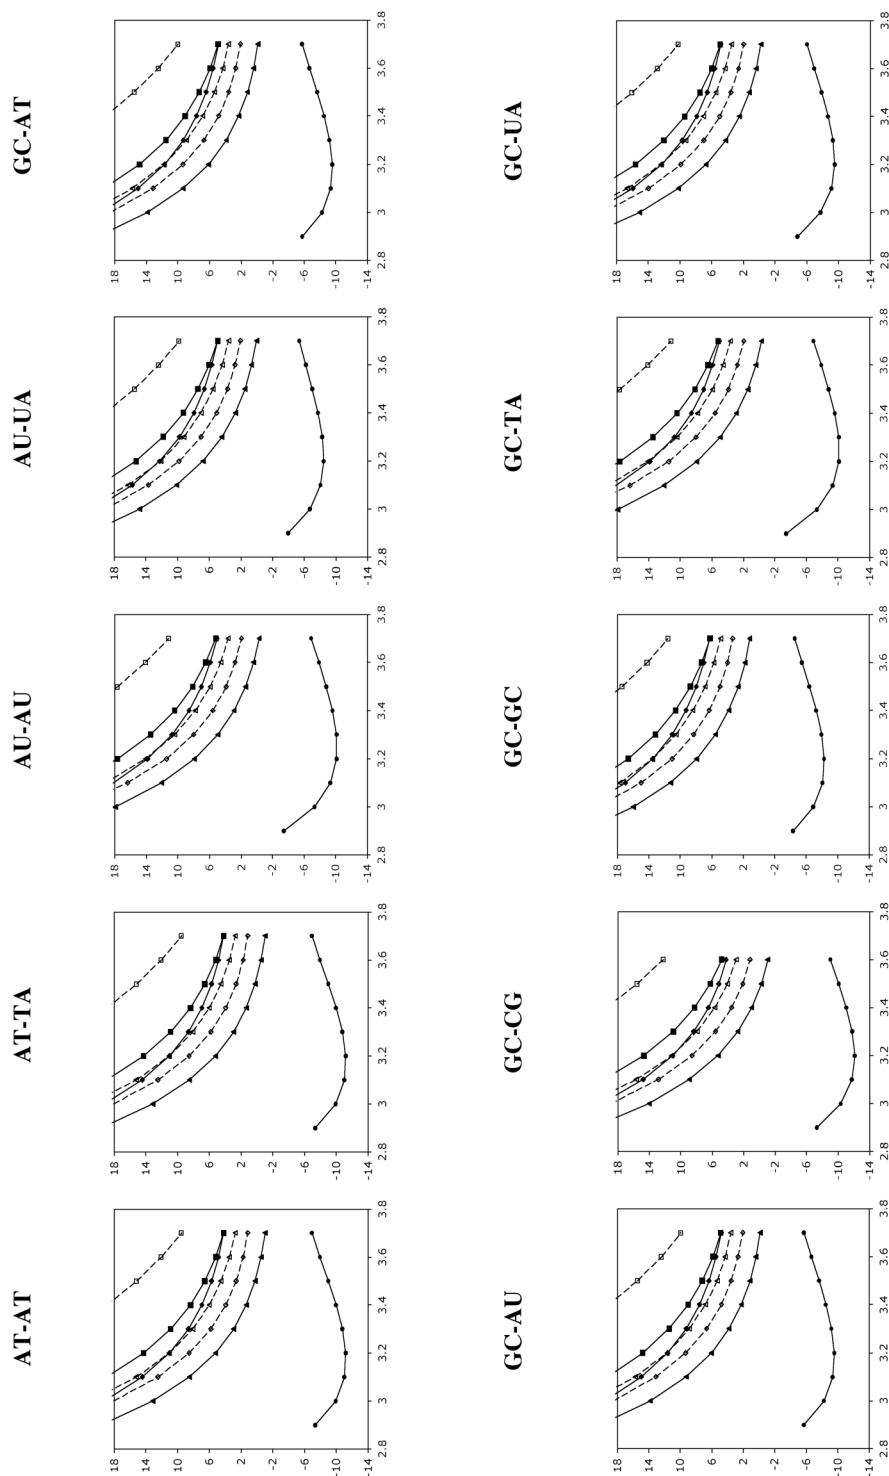

**Figure S4.** Energy (in kcal/mol) as a function of the vertical separation (in Å) for all stacks of base pairs, computed with various density functionals. The bold lines with filled circles, triangles, squares and diamonds show the results obtained using LDA, PW91, BLYP and BP86, respectively. The dashed lines with open squares, triangles and diamonds show the results obtained with OLYP, B3LYP and X3LYP, respectively.

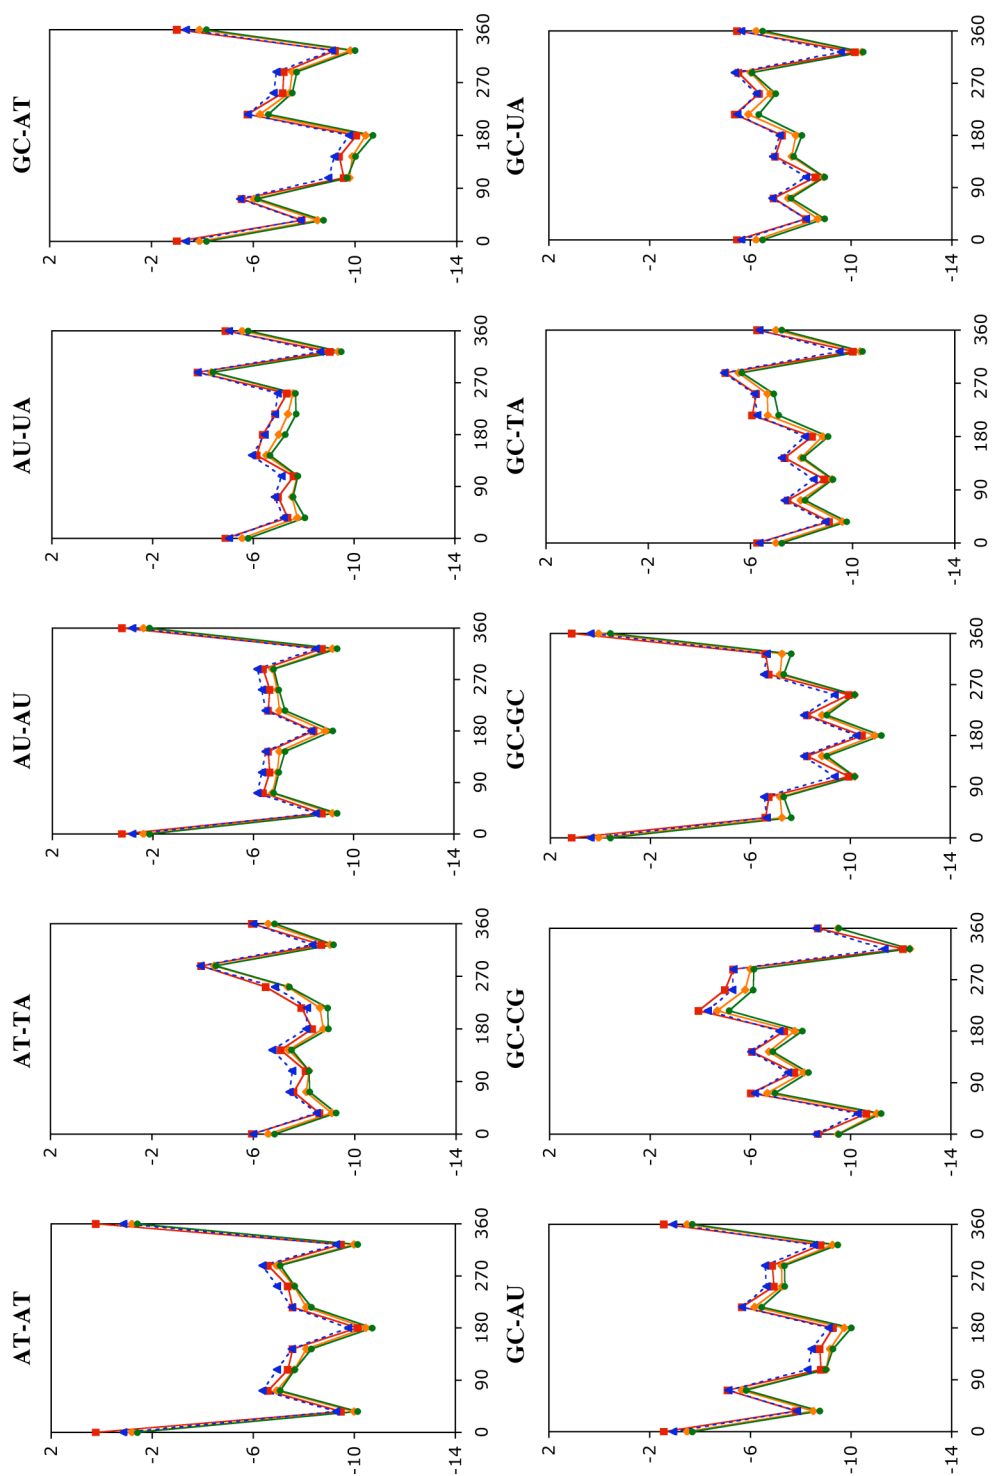

**Figure S5.** Energy (in kcal/mol) as a function of the twist angle (see Scheme 4) for all stacks of Watson-Crick base pairs, computed with the more satisfactorily performing density functionals LDA (orange diamonds), KT1 (green spheres), KT2 (blue triangles) and BHandH (red squares).
